# Supplementary material for: Minimum surfactant concentration required for inducing self-shaping of oil droplets and competitive adsorption effects
Source: Royal Society of Chemistry journal article supplement (doi:10.1039/d1sm01326b), 2022-01-01
Supplement: d1sm01326b1.pdf [file d1sm01326b1.pdf]

**Supplementary Information for:**  
**Minimum Surfactant Requirements for Inducing Self-shaping  
of Oil Droplets and Competitive Adsorption Effects**

**Jiale Feng<sup>1,5</sup>, Zhulieta Valkova<sup>2</sup>, E Emily Lin<sup>4</sup>, Ehsan Nourafkan<sup>4</sup>, Tiesheng Wang<sup>1,3</sup>, Slavka Tcholakova<sup>2\*</sup>, Radomir Slavchov,<sup>4</sup> Stoyan K. Smoukov<sup>1, 2, 4\*</sup>**

<sup>1</sup> *Active and Intelligent Materials Lab, Department of Materials Science & Metallurgy,  
University of Cambridge, 27 Charles Babbage Road, Cambridge CB3 0FS, UK*

<sup>2</sup> *Department of Chemical and Pharmaceutical Engineering, Faculty of Chemistry and  
Pharmacy, Sofia University, 1 James Bourchier Ave., 1164 Sofia, Bulgaria*

<sup>3</sup> *School of Mechanical Engineering, Shanghai Jiao Tong University, Shanghai, 200240,  
China*

<sup>4</sup> *School of Engineering and Materials Science, Queen Mary University of London,  
Mile End Road, London E1 4NS, UK*

<sup>5</sup> *Cavendish Laboratory, Department of Physics, University of Cambridge, JJ Thomson  
Avenue, Cambridge CB3 0HE, UK*

**Table S1.** Source (Sigma-Aldrich) and properties of the surfactants studied.

| Non-ionic surfactants                                            | Non-ionic surfactant (trade name) | Number of C atoms, n | Number of EO groups, m | HLB  | Structural formula                                                                                                                                |
|------------------------------------------------------------------|-----------------------------------|----------------------|------------------------|------|---------------------------------------------------------------------------------------------------------------------------------------------------|
| Polyoxyethylene Sorbitan monoalkylate<br>$C_n\text{SorbEO}_{20}$ | Tween 20                          | 12, 14, 16           | 20                     | 16.7 | 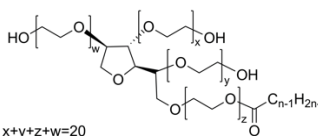<br>$x+y+z+w=20$                                             |
|                                                                  | Tween 40                          | 16, 18               | 20                     | 15.5 |                                                                                                                                                   |
|                                                                  | Tween 60                          | 16, 18               | 20                     | 14.9 |                                                                                                                                                   |
|                                                                  |                                   |                      |                        |      |                                                                                                                                                   |
| Polyoxyethylene alkyl ethers<br>$C_n\text{EO}_m$                 | Brij C10                          | 16                   | 10                     | 12   | <br>$C_n\text{H}_{2n+1}[\text{OCH}_2\text{CH}_2]_m\text{OH}$ |
|                                                                  | Brij S10                          | 18                   | 10                     | 12   |                                                                                                                                                   |
|                                                                  | Brij 58                           | 16                   | 20                     | 15.7 |                                                                                                                                                   |
|                                                                  | Brij S20                          | 18                   | 20                     | 15.3 |                                                                                                                                                   |

| Ionic surfactant               | Abbreviation        | Number of C atoms, n | Hydrophilic head group                                            | Purity | Structural formula                                                                                                                    |
|--------------------------------|---------------------|----------------------|-------------------------------------------------------------------|--------|---------------------------------------------------------------------------------------------------------------------------------------|
| Cetyltrimethylammonium bromide | C <sub>16</sub> TAB | 16                   | N <sup>+</sup><br>(CH <sub>3</sub> ) <sub>3</sub> Br <sup>-</sup> | > 99%  | $\text{H}_3\text{C}(\text{H}_2\text{C})_{15}-\overset{\text{CH}_3}{\underset{\text{CH}_3}{\text{N}^+}}-\text{CH}_3 \quad \text{Br}^-$ |

## Appendix

### Composition of adsorption layer

Tween 20 and Tween 60 mix ideally in the micelles. Under this assumption we can calculate the free concentration of molecules of Tween 20 and Tween 60 in the solution by using eqs. (12) and (9) from Clint<sup>[1]</sup> together with the experimentally determined values for CMC of Tween 20 and Tween 60:

$$C_1^{\text{monomer}} = CMC_1 \frac{\sqrt{\left[ \frac{C_{\text{tot}}}{CMC_1} - \left( \frac{CMC_2}{CMC_1} - 1 \right) \right]^2 + 4x_1 \frac{C_{\text{tot}}}{CMC_1} \left( \frac{CMC_2}{CMC_1} - 1 \right) - \left[ \frac{C_{\text{tot}}}{CMC_1} - \left( \frac{CMC_2}{CMC_1} - 1 \right) \right]}}{2 \left( \frac{CMC_2}{CMC_1} - 1 \right)}, \quad (1a)$$

$$C_2^{\text{monomer}} = \left( 1 - \frac{C_1^{\text{monomer}}}{CMC_1} \right) CMC_2 \quad (1b)$$

Here,  $C_1^{\text{monomer}}$  and  $C_2^{\text{monomer}}$  are the free monomer concentration of Tween 20 and Tween 60 in the aqueous solution,  $x_1$  is the molar fraction of Tween 20 and  $C_{\text{tot}}$  is the total surfactant concentration. Assuming that the molecular masses of Tween 20 and Tween 60 are 1228 g/mol and 1298 g/mol, we can calculate the free concentration of monomers in the solution. In order to estimate the ratio between Tween 20 and Tween 60 on the oil-water interface we used the expression for competitive adsorption on the interface assuming a Langmuir mixed adsorption isotherm<sup>[2]</sup>:

$$y_2 = \frac{\Gamma_2}{\Gamma_1 + \Gamma_2} = \frac{K_{A2} C_2^{\text{monomer}}}{K_{A1} C_1^{\text{monomer}} + K_{A2} C_2^{\text{monomer}}} \quad (2)$$

where  $y_2$  is the mole fraction of 2<sup>nd</sup> component (Tween 60) on the interface,  $\Gamma$  are the interface adsorptions of the respective components and  $K_A$  are the adsorption constants on the drop-water interface of the surfactant molecules, and  $C_1^{\text{monomer}}$  and  $C_2^{\text{monomer}}$  are the free monomer concentration of Tween 20 and Tween 60.

From interfacial tension isotherms we determined that CMC for Tween 20 is 0.0167

mM, whereas CMC for Tween 60 is 0.0108 mM. From the best fit of the experimental data around CMC we determined that  $\Gamma_{\text{CMC}}$  are  $4.3 \mu\text{mol}/\text{m}^2$  and  $4.4 \mu\text{mol}/\text{m}^2$  for Tween 20 and Tween 60, respectively. From the measured interfacial tensions below CMC by using the Langmuir adsorption isotherm we determined that the adsorption constants are  $2200 \text{ m}^3/\text{mol}$  and  $1900 \text{ m}^3/\text{mol}$  for Tween 20 and Tween 60, respectively. Using these values we determine the composition of adsorption layers given in Table S2.

The obtained results showed that the composition of the aqueous phase is close to the composition of the interface which is related to the fact that the determined CMC and adsorption constant of Tween 60 and Tween 20 do not differ significantly, which means that there is a significant fraction of long chain surfactants in Tween 20 which are able to adsorb on the solution surface and to decrease Tween-20's CMC.

Table S2

| Wt. ratio in aqueous solution<br>[Tween60]/[Tween20] |        | Free monomer concentration of Tween 60 in $\mu\text{M}$ | Surface occupation by Tween 60 (%) | Appearance of self-shaping |
|------------------------------------------------------|--------|---------------------------------------------------------|------------------------------------|----------------------------|
| % Tween60                                            |        |                                                         | From Eqn. 2                        |                            |
| 1:73                                                 | 1.35%  | 0.14                                                    | 0.72                               | No                         |
| 1:6.6                                                | 13.2%  | 1.3                                                     | 7.4                                | No                         |
| 1:3.28                                               | 23.4%  | 2.4                                                     | 14                                 | No                         |
| 1:1                                                  | 50%    | 5.2                                                     | 35                                 | Yes                        |
| 2:1                                                  | 66.7 % | 7.1                                                     | 51                                 | Yes                        |

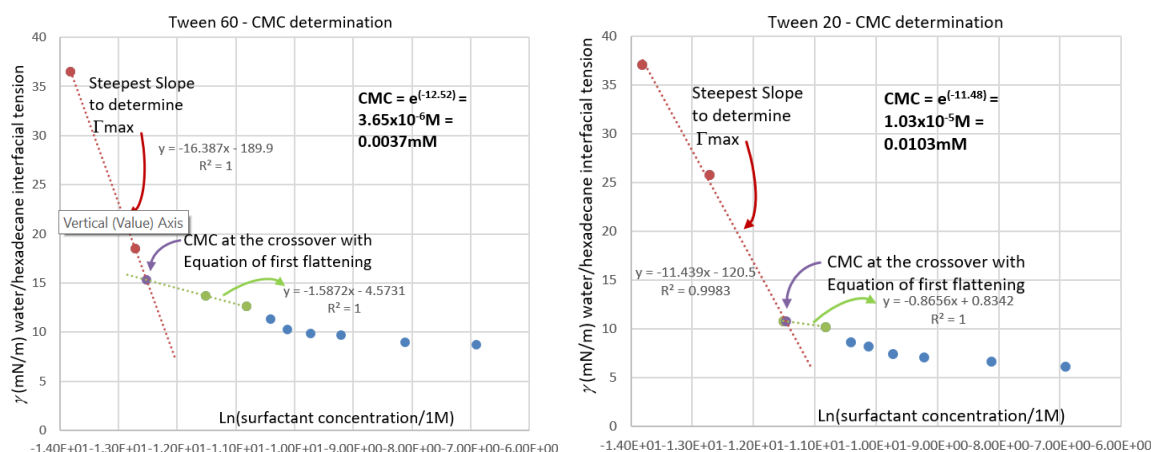

Figure S1. Adsorption isotherms for Tween 20 and Tween 60 at hexadecane-water interface at 20 °C.

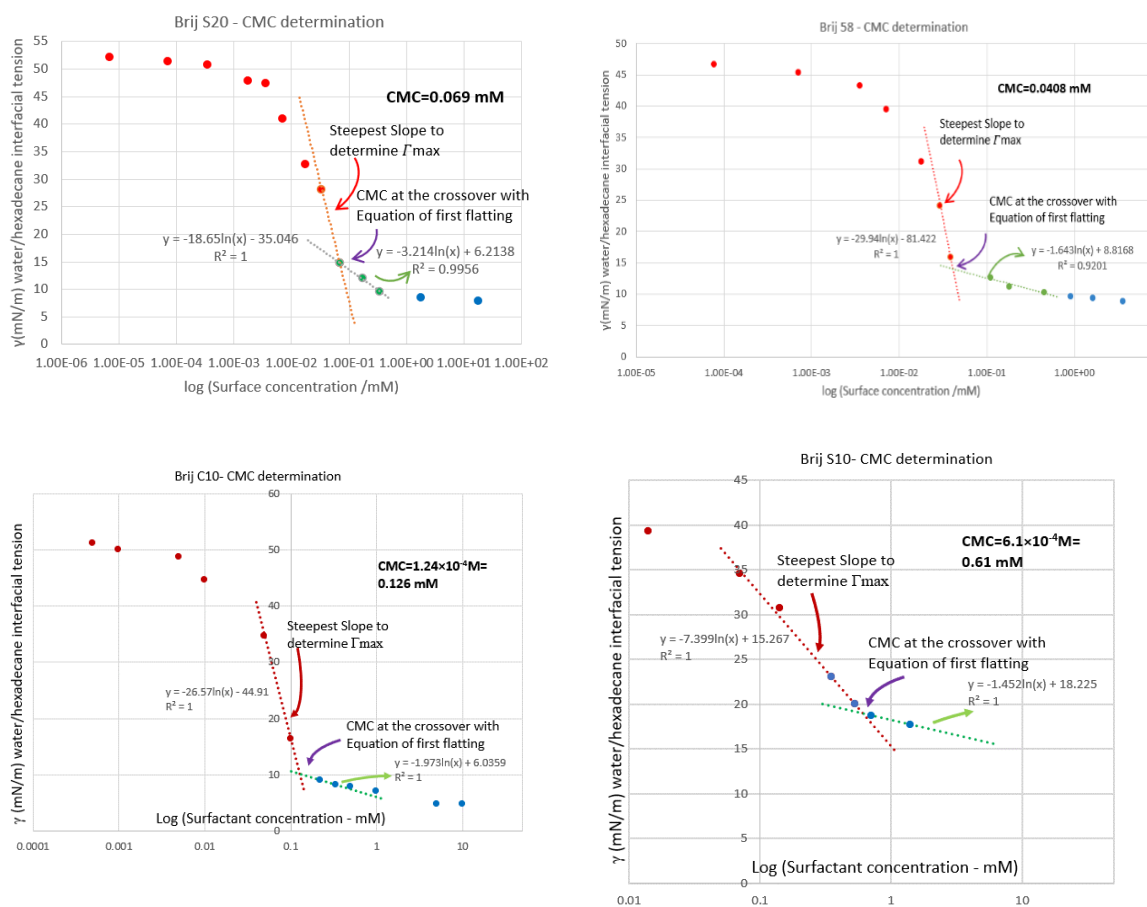

Figure S2. Adsorption isotherms for Brij S20, Brij 58, Brij C10 and Brij S10 at hexadecane-water interface at 20 °C.

Table S3

| Surfactant | Concentration (mM) | Multiple of CMC | Appearance of self-shaping |
|------------|--------------------|-----------------|----------------------------|
| Brij S20   | 0.21               | 3               | Yes                        |
|            | 0.13               | 1.9             | Yes                        |
|            | 0.034              | 0.49            | Yes                        |
|            | 0.0093             | 0.13            | No                         |
| Brij 58    | 0.41               | 10              | Yes                        |
|            | 0.3                | 6.5             | Yes                        |
|            | 0.06               | 1.3             | Yes                        |
|            | 0.03               | 0.65            | No                         |
| Brij S10   | 0.7                | 1.15            | Yes                        |
|            | 0.5                | 0.86            | Partially self-shaping     |
|            | 0.35               | 0.57            | Partially self-shaping     |
|            | 0.14               | 0.23            | No                         |
| Brij C10   | 0.5                | 3.96            | Yes                        |
|            | 0.3                | 2.6             | Yes                        |
|            | 0.2                | 1.7             | Yes                        |

|  |     |     |    |
|--|-----|-----|----|
|  | 0.1 | 0.7 | No |
|--|-----|-----|----|

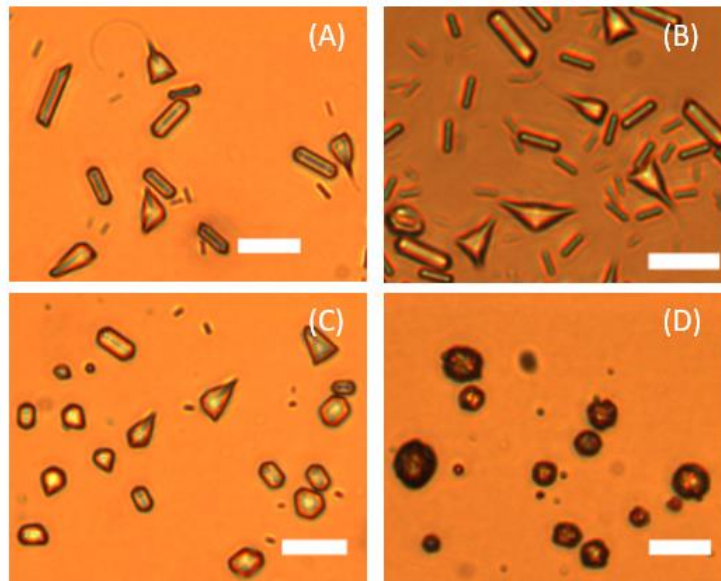

Figure S3: **Drop shape transformations for emulsions of hexadecane drops in water stabilized by Brij S20.** Cooling rate is  $0.5 \text{ K min}^{-1}$ . The total surfactant concentration in the emulsion is (A) 0.21 mM, (B) 0.13 mM, (C) 0.034 mM, (D) 0.0093 mM Scale bars:  $20 \mu\text{m}$ .

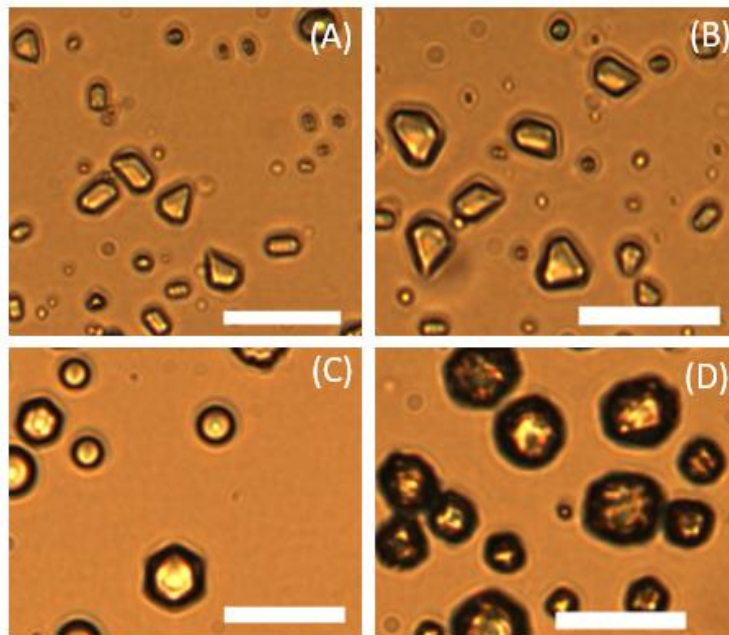

Figure S4: **Drop shape transformations for emulsions of hexadecane drops in water stabilized by Brij 58.** Cooling rate is  $0.5 \text{ K min}^{-1}$ . The total surfactant concentration in the emulsion is (A) 0.41 mM, (B) 0.3 mM, (C) 0.06 mM, (D) 0.03 mM Scale bars:  $20 \mu\text{m}$ .

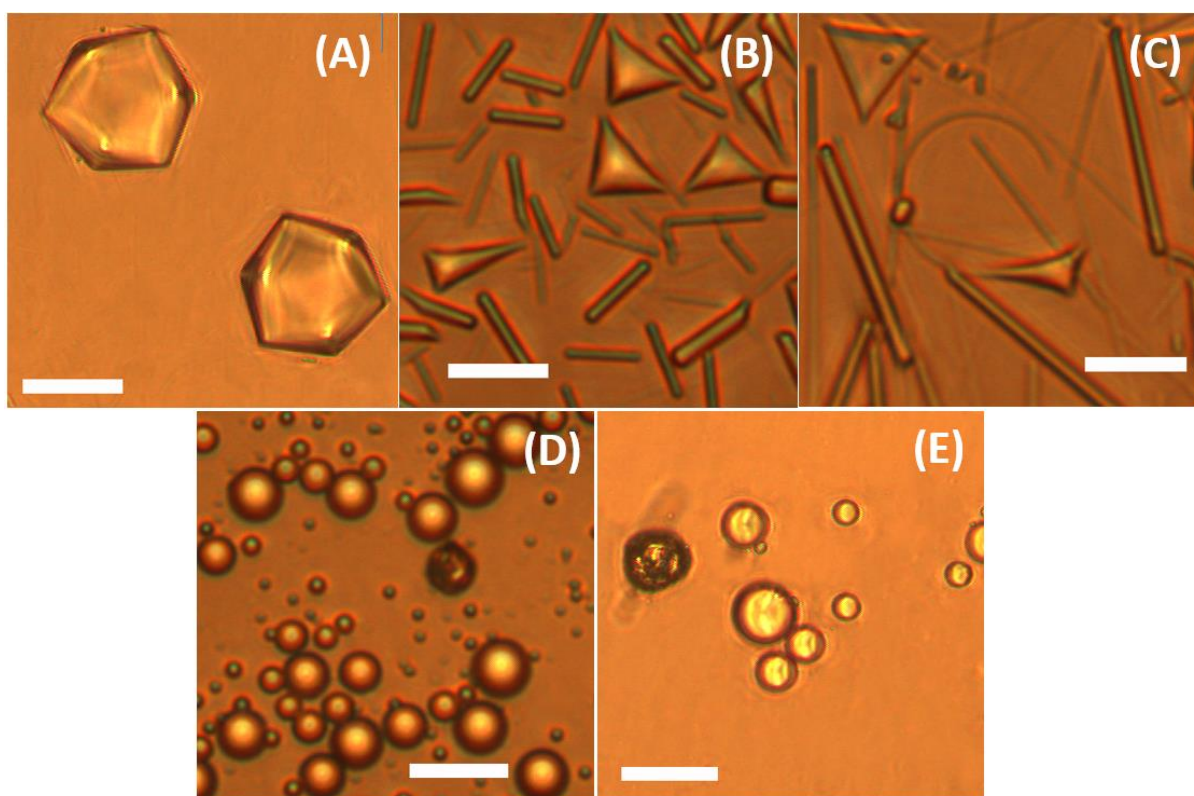

Figure S5: **Drop shape transformations for emulsions of hexadecane drops in water stabilized by Brij C10.** Images on the **first row** are obtained with emulsions prepared by the double syringe emulsification technique. Droplets  $d_{ini} \approx 15 \mu\text{m}$  and the cooling rate is  $0.5 \text{ K min}^{-1}$ . The total surfactant concentration in the emulsion is (A) 0.5 mM, (B) 0.3 mM, (C) 0.2 mM, (D) 0.1 mM and (E) 0.05 mM. Scale bars:  $20 \mu\text{m}$ .



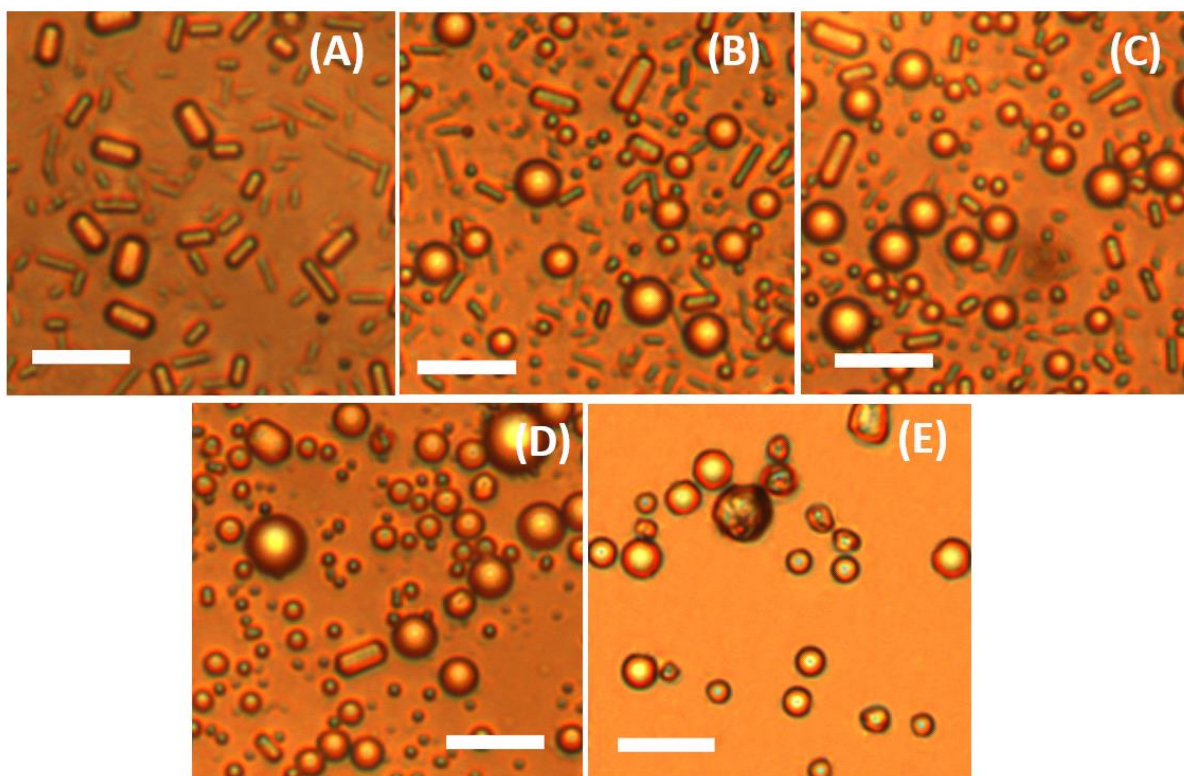

Figure S6: **Drop shape transformations for emulsions of** hexadecane drops in water stabilized by Brij S10. Images on the **first row** are obtained with emulsions prepared by the double syringe emulsification technique. Droplets  $d_{ini} \approx 15 \mu\text{m}$  and the cooling rate is  $0.5 \text{ K min}^{-1}$ . The total surfactant concentration in the emulsion is (A) 0.7 mM, (B) 0.5 mM, (C) 0.35 mM, (D) 0.14 mM and (E) 0.07 mM. Scale bars:  $20 \mu\text{m}$ .

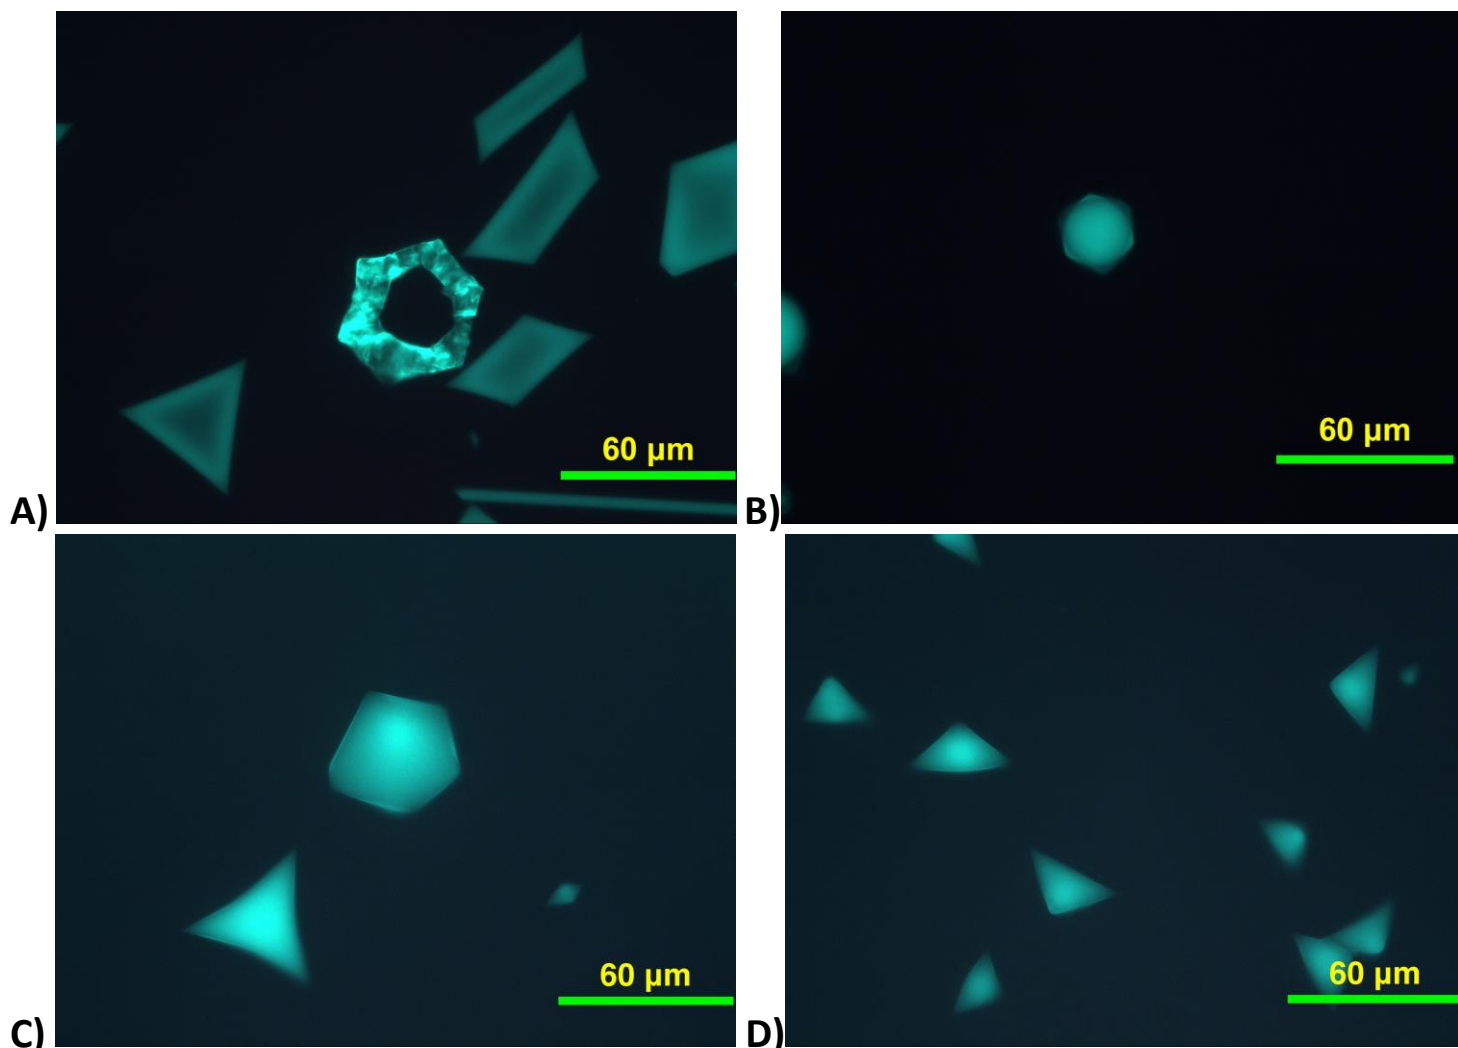

Figure S7. Fluorescence micrographs of hexadecane droplets containing 0.001% fluorescent dye (Solvent Green 5), in aqueous solutions with various non-ionic surfactants. All solutions contained 1.5 wt.% of surfactant in the water phase and were cooled at 0.2 K/min. (A) Tween 40. Frozen hexagonal droplet surrounded by liquid droplets of other shapes. B) Brij 58. C, D) Brij S20. C) shows initial deformations at temp  $\sim 15$  °C, while D) shows later deformation to swimming shapes, as documented in our recent paper,[3] and Figure S3, at temp  $\sim 14$  °C.

- [1] J. H. Clint, *J. Chem. Soc. Faraday Trans. 1 Phys. Chem. Condens. Phases* **1975**, *71*, 1327.
- [2] E. C. Markham, A. F. Benton, *J. Am. Chem. Soc.* **1931**, *53*, 497.
- [3] D. Cholakova, M. Lisicki, S. K. Smoukov, S. Tcholakova, E. E. Lin, J. Chen, G. De Canio, E. Lauga, N. Denkov, *Nat. Phys.* **2021**, *17*, 1050.
